# Supplementary material for: Modular Synthesis of Bioreducible Gene Vectors through Polyaddition of N,N′-Dimethylcystamine and Diglycidyl Ethers
Source: MDPI journal article supplement (doi:10.3390/polym10060687), 2018-06-20
Supplement: s1 [file s1]

## Supplementary Information

# Modular Synthesis of Bioreducible Gene Vectors Through Polyaddition of *N,N'*-Dimethylcystamine and Diglycidyl Ethers

Guoying Si,<sup>1,†</sup> M. Rachèl Elzes,<sup>1,†</sup> Johan F.J. Engbersen<sup>2</sup> and Jos M.J. Paulusse<sup>1,3,\*</sup>

<sup>1</sup> Department of Biomolecular Nanotechnology, MESA+ Institute for Nanotechnology, Faculty of Science and Technology, University of Twente, P.O. Box 217, 7500 AE Enschede, The Netherlands

<sup>2</sup> 20Med Therapeutics, Zuidhorst 251, Drienerlolaan 5, 7522 NB Enschede, The Netherlands

<sup>3</sup> Department of Nuclear Medicine and Molecular Imaging, University Medical Center Groningen, P.O. Box 30.001, 9700 RB Groningen, The Netherlands

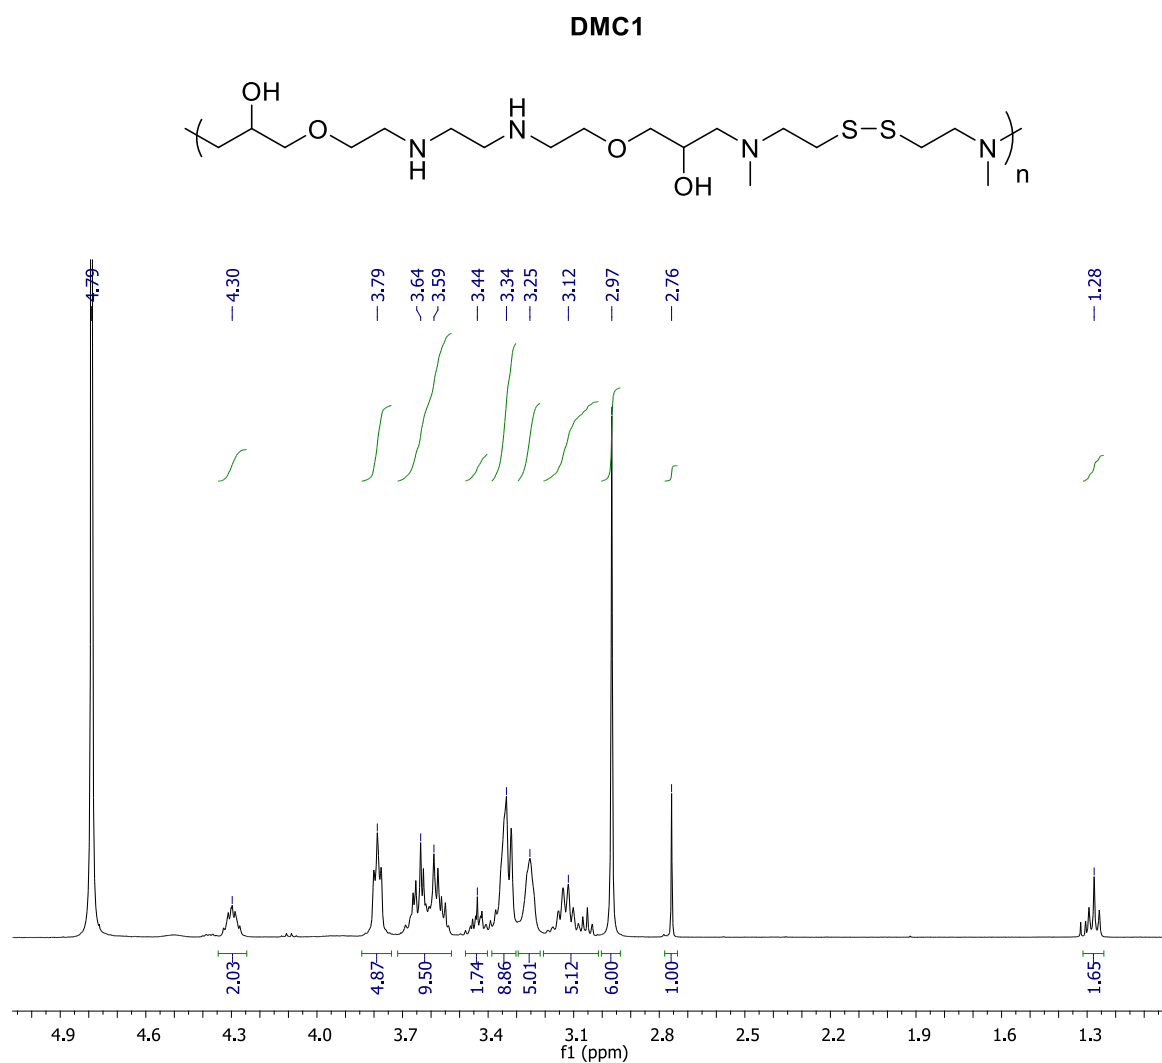

Figure S1. <sup>1</sup>H-NMR spectrum of DMC1 in D<sub>2</sub>O.

DMC2

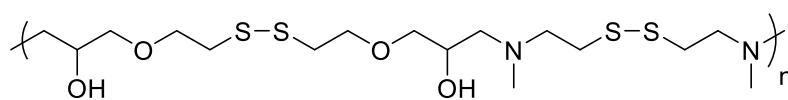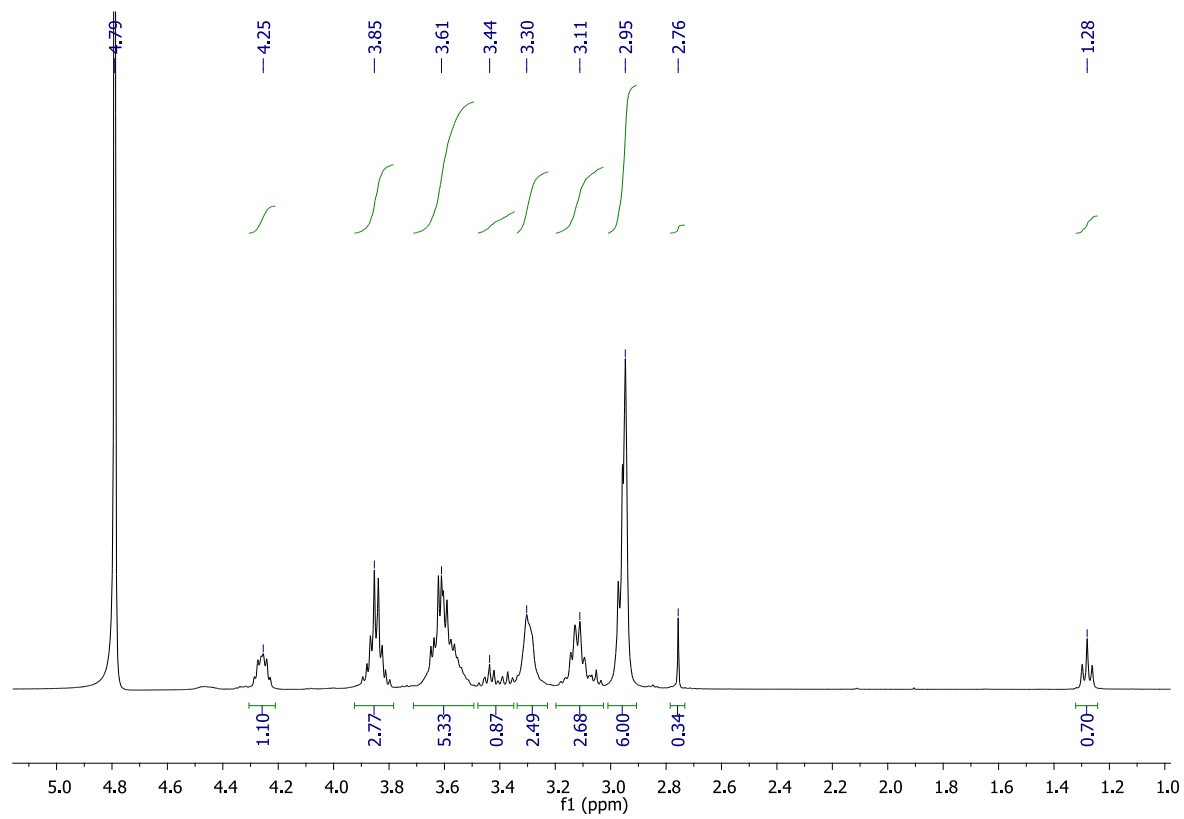

Figure S2. <sup>1</sup>H-NMR spectrum of DMC2 in D<sub>2</sub>O.

DMC3

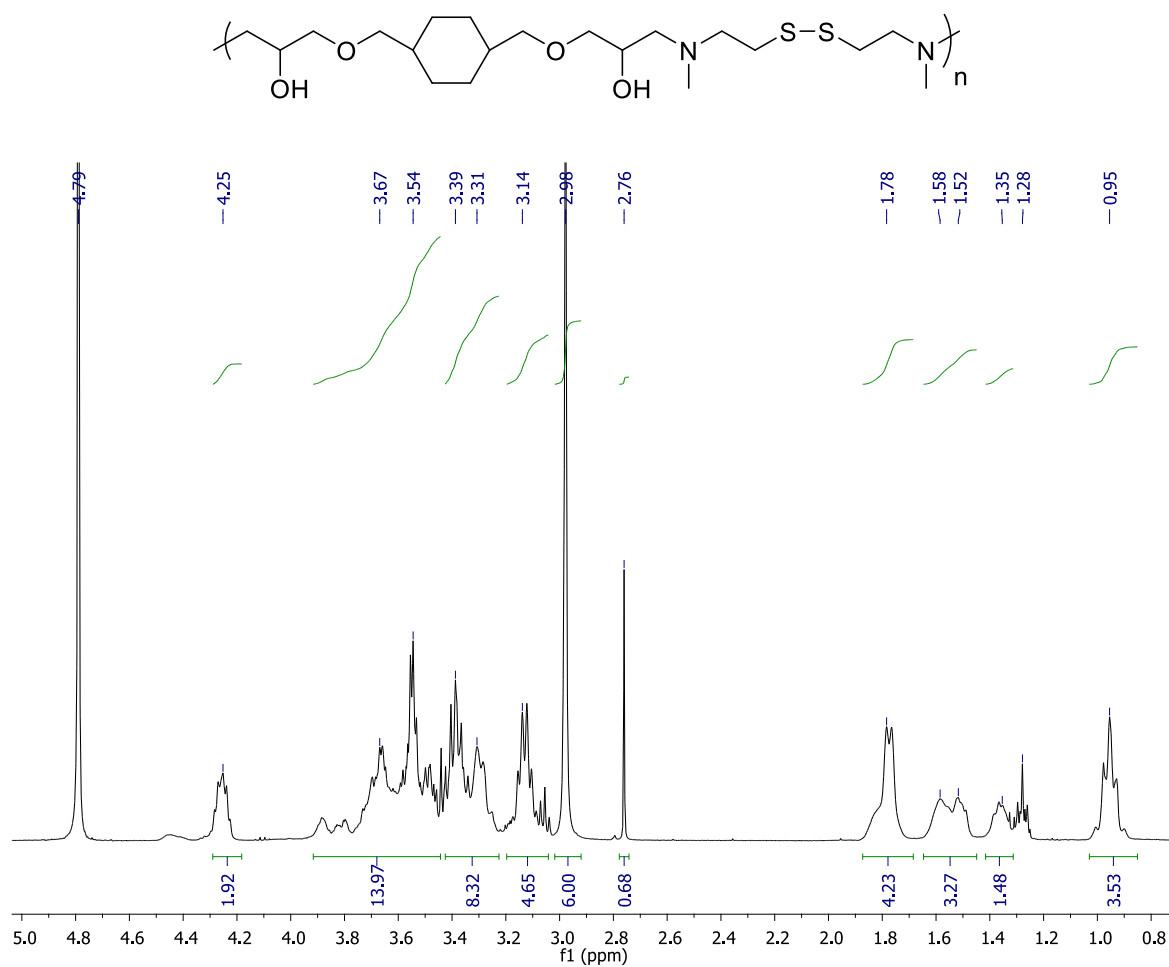

Figure S3. <sup>1</sup>H-NMR spectrum of DMC3 in D<sub>2</sub>O.

### DMC4

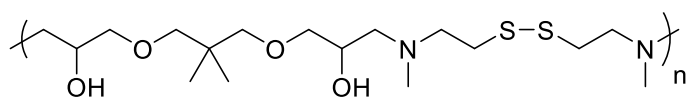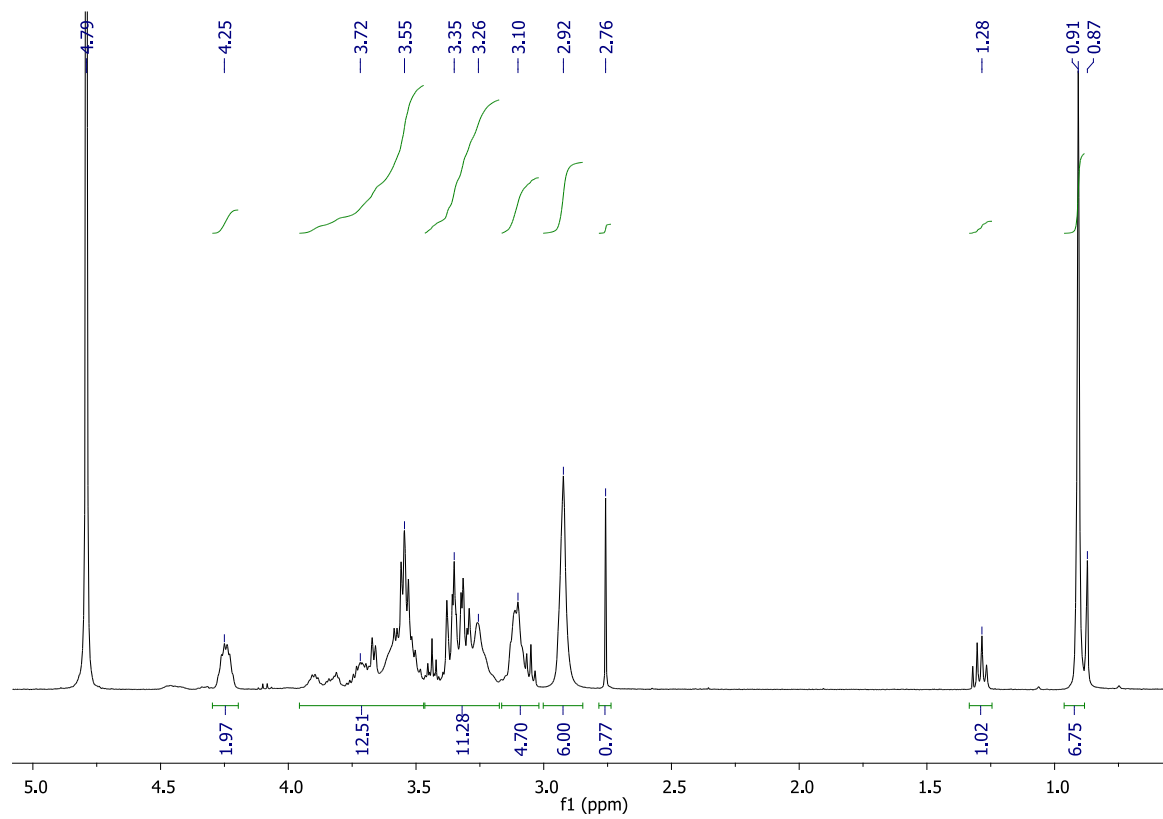

Figure S4. <sup>1</sup>H-NMR spectrum of DMC4 in D<sub>2</sub>O.

DMC5

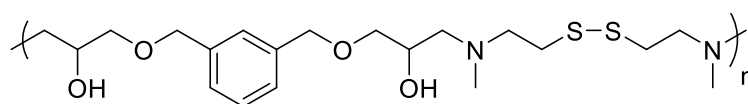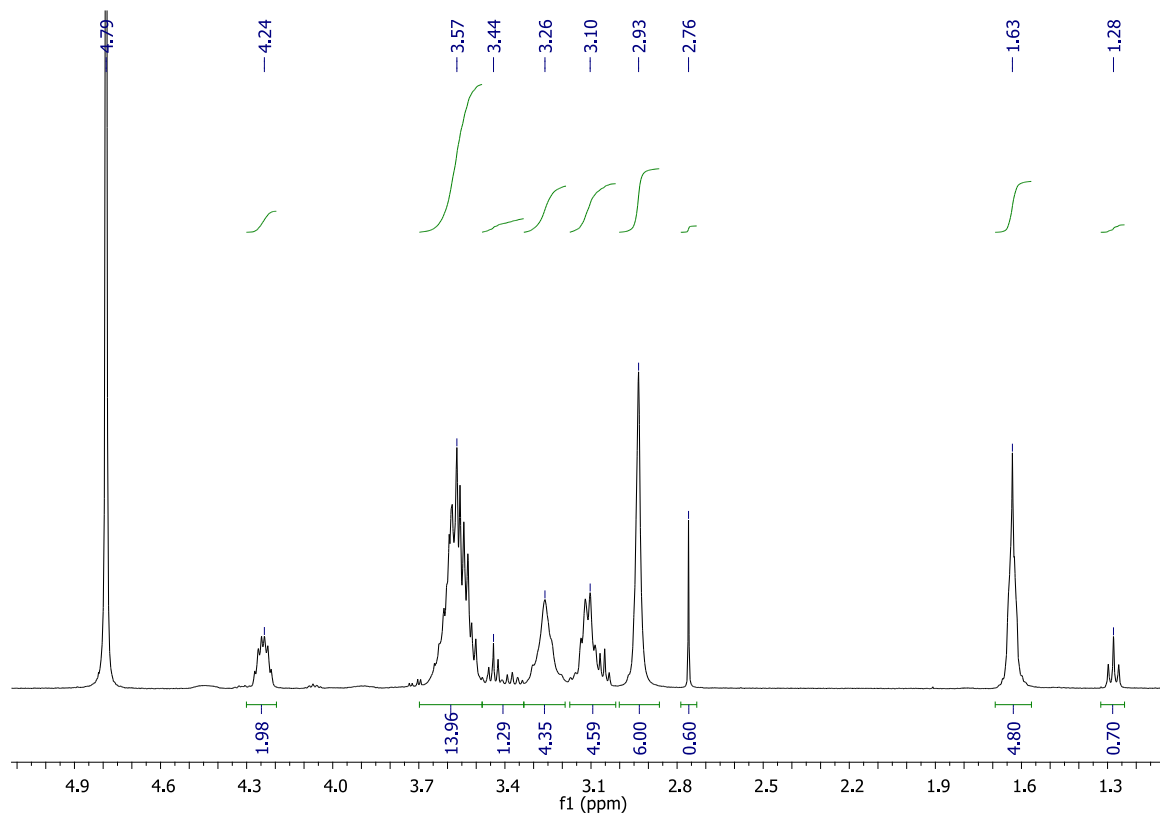

Figure S5. <sup>1</sup>H-NMR spectrum of DMC5 in D<sub>2</sub>O.

### DMC6

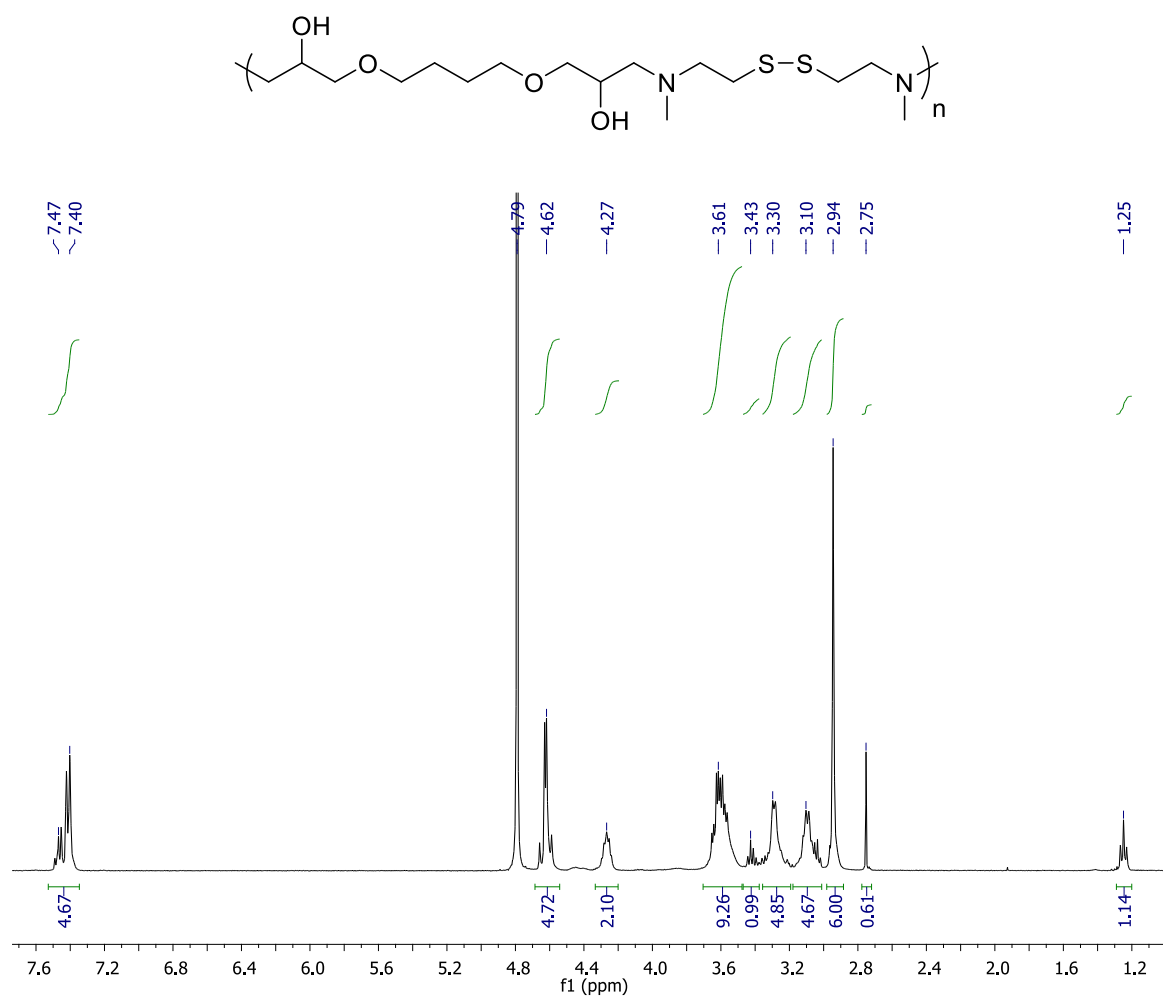

Figure S6. <sup>1</sup>H-NMR spectrum of DMC6 in D<sub>2</sub>O.
